# Supplementary material for: Alterations of the NK cell pool in HIV/HCV co-infection
Source: PLoS One. 2017 Apr 5;12(4):e0174465. doi: 10.1371/journal.pone.0174465 (PMC5381812; doi:10.1371/journal.pone.0174465)
Supplement: S2 Table — (XLSX) [file pone.0174465.s003.xlsx]

## Sheet: Fig 3
	Original data shown in figure 3B
	%CD27(+) of CD56(+) NK cells				%CD27(+) of CD56dim NK cells				%CD27(+) of CD56bright NK cells
	healthy	HIV	HCV	HIV/HCV	healthy	HIV	HCV	HIV/HCV	healthy	HIV	HCV	HIV/HCV
	7.24	3.94	3.14	9.7	6.08	3.21	2.02	2.78	60.84	52.27	50.29	58.3
	4.03	3.78	6.68	7.22	2.32	2.6	4.96	1.73	61.34	44.96	40.12	54.32
	6.16	14	15.73	6.23	4.3	8.29	8	3.73	48.4	49.74	68.46	62.67
	6.3	2.33	3.31	2.9	5.31	1.77	2.09	2.12	45.06	25.74	35.8	36.2
	19.23	3.77	8.13	11.49	11.15	1.31	3.67	8.15	69.06	32.69	67.25	55.02
	6.78	22.64	19.48	9.49	3.32	7.15	5.79	5.78	52.73	49.19	57.02	43.14
	5.26	11.35	9.41	8.29	4.09	5.88	5.37	5.31	64.66	46.88	68.82	52.3
	5.9	6.24	7.83	14.87	4.41	3.49	4.71	7.21	49.28	50.6	53.76	51.06
	13.84	10.9	13.36	12.92	12.73	9.21	5.22	6.85	46.45	51.2	65.03	61.92
	4.81	4.97	22.31	0.76	4.12	4.39	8.43	0.33	55.69	30.6	93.05	24.81
	6.41	8.23	31.33	0.12	5.53	5.56	11.96	0.12	44.87	60.7	68.02	10
	13.65	6.6	8.56	8.33	7.15	5.74	5.79	4.52	44.99	45.4	40.27	57.57
	6.36	3.87	13.86	13.28	3.04	1.97	7.89	4.43	61.2	45.2	65.43	40.75
	4.45	6.61	15.48	18.21	3.05	4.21	1.5	12.47	50.71	43.5	27.21	42.05
	8.44	10.1	33.33	11.09	6.63	5.48	14.66	7.23	52.63	55.1	58.7	38.81
	9.87	3.8	7.46	8.15	7.4	1.91	1.75	4.8	59.46	43.9	57.03	57.95
	3.03	4.14	14.45	7.97	1.64	2.37	6.1	4.32	70.57	37.2	69.36	55.43
	7.09	9			4.05	6.01			61.32	38.5
		4.6				3.7				54.5
		1.61				1.1				20.5
	%CD62L(+) of CD56(+) NK cells				%CD62L(+) of CD56dim NK cells				%CD62L(+) of CD56bright NK cells
	healthy	HIV	HCV	HIV/HCV	healthy	HIV	HCV	HIV/HCV	healthy	HIV	HCV	HIV/HCV
	40.51	18.32	42.81	28.55	40.09	17.68	40.51	23.99	75.32	74.8	81.15	71.3
	47.4	5.97	17.4	21.97	47.1	5.55	15.71	20.26	63.25	33.68	60.6	57.73
	52.56	17.06	32.68	26.4	44.09	15.33	29.26	25.15	85.84	81.02	85.89	66.96
	29.41	17.38	32.08	3.3	25.39	14.51	27.27	2.82	77.22	46.06	97.22	28.75
	35.67	9.31	26.73	6.52	35.14	8.5	25.18	3.64	65.05	53.49	64.24	81.06
	40	14.53	50.85	31.65	36.37	10.36	44.03	30.46	85.53	62.47	99.54	63.71
	32.17	26.52	43.42	11.99	31.13	12.19	33.36	10.28	68.1	59.06	99.08	33.22
	25.21	45.3	32.42	10.33	24.73	43.51	23.4	9.78	60.47	67.95	66.53	33.04
	23.43	21.8	30.12	20.19	22.68	17.85	28.07	18.72	63.43	78.15	70.87	47.4
	12.67	3.635	15.29	37.54	11.36	3.09	13.83	34.56	69.13	68.2	48.28	64.92
	20.87	9.435	74.24	37.15	18.94	5.92	55.34	34.81	75	41.6	99.19	84.94
	30.07		80.6	27.85	28.21		67.76	25.5	75		97.8	59.15
	20.02		56.64		19.56		50.35		62.35		97.07
	39.45				38.55				73.35
	43.2				38.25				91.45
	%CD127(+) of CD56(+) NK cells				%CD127(+) of CD56dim NK cells				%CD127(+) of CD56bright NK cells
	healthy	HIV	HCV	HIV/HCV	healthy	HIV	HCV	HIV/HCV	healthy	HIV	HCV	HIV/HCV
	9.49	0.65	2.09	3.27	8.57	0.56	1.42	1.45	61.6	6.38	49.71	16.08
	5.22	2.45	8.73	7.98	3.07	1.5	6.99	1.4	78.34	64.77	63.27	64.5
	4.42	2.68	7.91	1.21	2.94	1.18	3.11	0.91	62.35	54.8	54.54	8
	24.02	4.25	3.5	0.96	14.86	1.95	1.49	0.73	63.58	18.65	57.27	12.88
	8.98	0.61	5.05	3.14	3.6	0.48	1.89	0.31	80.45	5.94	64.15	51.59
	11.15	4.32	11.88	7.23	10.16	1.38	3.79	2.4	72.92	38.98	34.07	70.1
	3.38	8.28	8.58	4.55	1.16	1.59	4.59	2.61	68.27	51.76	73.12	33.22
	2.7	3.13	11.86	1.85	1.01	1.92	3.31	1.16	52.69	22.9	70.88	41.57
	2.57	2.93	15.47	18.91	2.25	2.34	2.09	6.03	16.67	20.6	83.51	58.92
	20.51	1.65	24.04	8.71	9.73	3.79	7.66	2.58	79.78	34.7	59.51	55.88
	8.38	3.66	5.76	2.51	3.63	2.03	2.5	1.78	72.44	31.5	57.92	7.76
	2.25	1.26	6.3	7.91	1.68	1.18	2.17	4.03	16.32	3.76	55.92	65.89
	1.94	3.86	30.53	2.88	0.61	3.25	10.47	0.52	66.58	16	84.07	12
	12.8	1.26	30.21	5.7	9.45	1.18	16.48	2.35	63.88	3.76	64.09	22.1
	5.14	1.05	16.42		1.09	1.02	10.35		43.8	1.66	68.05
	6.5	0.7	15.78		2.45	0.61	5.29		39.1	2.46	79.66
		1.26				0.97				9.45
	%CD57(+) of CD56(+) NK cells				%CD57(+) of CD56dim NK cells				%CD57(+) of CD56bright NK cells
	healthy	HIV	HCV	HIV/HCV	healthy	HIV	HCV	HIV/HCV	healthy	HIV	HCV	HIV/HCV
	33.94	44.58	49.49	33.64	34.71	45.39	50.53	38.44	1.44	1.9	14.14	0.26
	29.76	64.97	46.85	20.79	30.57	66.18	52.2	22.38	0.93	3.88	3.04	0.36
	40	64.52	32.38	38.3	40.85	66.38	33.66	39.95	1.05	2.88	1.12	1.47
	48.04	39.76	57.19	58.46	51.16	45.57	62.42	59.21	1.96	2.04	1.34	2.13
	14.3	56.31	56.8	49.59	14.38	57.65	61.6	52.42	1.41	2.2	14.8	0
	30.31	81.48	15.41	58.7	31.28	88.08	20.57	63.99	1.45	1.47	1.16	1.06
	1.87	24.07	14.79	50.11	1.9	38.39	15.74	52.05	0	0.4	0.45	9.28
	23.76	10.48	44.98	66.8	24.19	11.87	48.18	68.15	3.05	1.42	3.21	5.71
	18.15	54.33	36.38	34.36	21.51	58.43	41.68	44.15	0.52	1.3	0.56	0.75
	28.885	86.93	36.38	50.98	31.975	89.12	44.28	57.52	0.115	2.67	0.62	2.95
	40.34	56.95	27.14	50.92	41.49	64.16	40.41	54.7	0.64	0.44	2.44	0
	51.08		21.76	58.2	51.26		23.46	62.2	14.71		0.65	4.7
	39.24		25.16	70.7	40.88		27.46	73.4	1.5		0	2.93
	22.8		18.24	48.7	23.99		24.91	65.2	1.53		0.47	2.89
	47.87		12.63	37.7	48.99		22.59	56.6	1.42		0.74	1
	48.09		39.26		49.77		42.25		1.27		1.76
			24.13				27.88				1.85
